# Supplementary material
Source: PubMed Central journal article supplement (PMC3567639)
Supplement: supp_M112.426338_jbc.M112.426338-1.pdf [file supp_M112.426338_jbc.M112.426338-1.pdf]

## SUPPLEMENTAL TABLES

### Hypoxia-inducible Factor 1 $\alpha$ Regulates a Socs3-Stat3-adiponectin Signal Transduction Pathway in Adipocytes

#### SUPPLEMENTAL TABLE1 PRIMER LIST

| ChIP                |                                                           |
|---------------------|-----------------------------------------------------------|
| Socs3 HRE1 F        | 5' - CCAGGAGTAAACAACCTTTCACCTC - 3'                       |
| Socs3 HRE1 R        | 5' - AATGGACCCTCTCTTGCCTCTACG - 3'                        |
| Socs3 HRE2 F        | 5' - CACAGTTCGCCACGCAGGTTG - 3'                           |
| Socs3 HRE2 R        | 5' - GAAGCAGCTACCTGGCCTCAG - 3'                           |
| Adiponectin Site1 F | 5' - CTCAGCGTGTTCATTCCAGTA - 3'                           |
| Adiponectin Site1 R | 5' - GTGTGTGTGTGTGTGTGTGTGC - 3'                          |
| Adiponectin Site2 F | 5' - TGCTTCACTCTGGGCAGTAACACA - 3'                        |
| Adiponectin Site2 R | 5' - AGTGTAGCCCAAGCTATCCTGGAA - 3'                        |
| Adiponectin Site3 F | 5' - GCTGGTGGGAATGATAACTAGTCCA - 3'                       |
| Adiponectin Site3 R | 5' - ATCTGCCACCACTGCCAGCTATTT - 3'                        |
|                     |                                                           |
| Luciferase          |                                                           |
| Socs3 F1            | 5' - CGACGCGTCGGACAGATGGGCACCCATCCCT-3'                   |
| Socs3 F2            | 5' - CGACGCGTCGCCACTTCTAGGTCCCAAGTG -3'                   |
| Socs3 R             | 5' - CCGCTCGAGCGGAGCAGGCGAGTGTAGAGTCAG -3'                |
| Socs3-1.6k-AscI-F   | 5' - aaaaGGCGCGCCGACAGATGGGCACCCATCCCT -3'                |
| Socs3-1.6K-PacI-R   | 5' - aaaaTTAATTAAGCAGGCGAGTGTAGAGTCAG - 3'                |
| Socs3-1.6K-mt1-F    | 5' -TAGGCCTTTATAGATACTCACaaGACCAGGAGTAAACAACC - 3'        |
| Socs3-1.6K-mt1-R    | 5' -GGTTGTTTACTCTGGTCTTGTGAGTATCTATAAAGGCCTA - 3'         |
| Socs3-1.6K-mt2-F    | 5' -CAAAGGACATCAGCACCCaaGTCTGTCCAGGAAGAACA - 3'           |
| Socs3-1.6K-mt2-R    | 5' -TGGTTCCTCGGTGACAGACTTGGGTGCTGATGTCCTTTG - 3'          |
| Adiponectin-4kb F   | 5' -AAAAAGGCGCGCCTGTGGTTTCTGGGAATTAGAATTCAGGGCCTC - 3'    |
| Adiponectin-2kb F   | 5' -AAAAAGGCGCGCCCTAGCCTCAAGACATGTGTGGTTGAATG - 3'        |
| Adiponectin-1kb F   | 5' -AAAAAGGCGCGCCTTGCCAAGCTGCAAGCCTTTTAGGAGC - 3'         |
| Adiponectin R       | 5' -AAAAATTAATTAACAGCTTACCATTGGCCAACCCAGTCAA - 3'         |
| Adiponectin S1WT F  | 5' -AAAAAGGCGCGCCAGCAAGTTCAGGATAGCTTGGGCTACTG - 3'        |
| Adiponectin S1MT F  | 5' -AAAAAGGCGCGCCAGCAAGTGTGAGGATAGCTTGGGCTACTG - 3'       |
| Adiponectin S2WT F  | 5' -AAAAAGGCGCGCCTTGCATTCCAGTAAGAAGCGAAAGACAGTAACACAC - 3 |
| Adiponectin S2MT F  | 5' -AAAAAGGCGCGCCTTGCATGTGAGTAAGAAGCGAAAGACAGTAACACAC - 3 |
|                     |                                                           |
| CYC1 F              | 5'- GAGGCCGAAAGGTGATGCT - 3'                              |
| CYC1 R              | 5'- GCACTCACGGCAGAATGAAG - 3'                             |
| COX4I1 F            | 5'- GAGCCTGATTGGCAAGAGAG - 3'                             |
| COX4I1 R            | 5'- GATCAGCGTAAGTGGGGAAA - 3'                             |
| COX4I2 F            | 5'- GGCTGCGTCTTCTTTCAT - 3'                               |

|                          |                                     |
|--------------------------|-------------------------------------|
| COX4I2 R                 | 5'- ATGGGGTTGCTCTTCATGTC - 3'       |
| ATP5J F                  | 5'- GTCACGGACAAAATGGTGC - 3'        |
| ATP5J R                  | 5'- AGGTAAGTGTAGCGCTTGGC - 3'       |
| Socs3 F                  | 5'- GCGGGCACCTTTCTTATCC - 3'        |
| Socs3 R                  | 5'- TCCCCGACTGGGTCTTGAC - 3'        |
| Adiponectin F            | 5'- CTCTAAAGATTGTCAGTGGATCTG - 3'   |
| Adiponectin R            | 5'- ACGTCATCTTCGGCATGACT - 3'       |
| Glut-1 F                 | 5' - CCAGCTGGGAATCGTCGTT - 3'       |
| Glut-1 R                 | 5' - CAAGTCTGCATTGCCCATGAT - 3'     |
| $\beta$ -actin F         | 5' - TATTGGCAACGAGCGGTCC - 3'       |
| $\beta$ -actin R         | 5' - GGCATAGAGGTCTTTACGGATGTC - 3'  |
|                          |                                     |
| <b>SiRNA</b>             |                                     |
| HIF-1 $\alpha$ sense     | 5' - UACUCAGAGCUUUGGAUCAAGUAAA - 3' |
| HIF-1 $\alpha$ antisense | 5' - UUAACUUGAUCCAAAGCUCUGAGUA - 3' |
| Socs3 sense              | 5' - GCCACUUCUUCACGUUGAGCGUCAA - 3' |
| Socs3 antisense          | 5' - UUGACGCUCAACGUGAAGAAGUGGC - 3' |
